# Supplementary material for: Immune Monitoring in Melanoma and Urothelial Cancer Patients Treated with Anti-PD-1 Immunotherapy and SBRT Discloses Tumor Specific Immune Signatures
Source: MDPI journal article supplement (doi:10.3390/cancers13112630), 2021-05-27
Supplement: s1 [file s1]

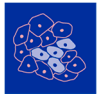

---

# **Supplementary Material: Immune Monitoring in Melanoma and Urothelial Cancer Patients Treated with Anti-PD-1 Immunotherapy and SBRT Discloses Tumor Specific Immune Signatures**

Annabel Meireson, Simon J. Tavernier, Sofie Van Gassen, Nora Sundahl, Annelies Demeyer, Mathieu Spaas, Vibeke Kruse, Liesbeth Ferdinande, Jo Van Dorpe, Benjamin Hennart, Delphine Allorge, Filomeen Haerynck, Karel Decaestecker, Sylvie Rottey, Yvan Saeys, Piet Ost and Lieve Brochez

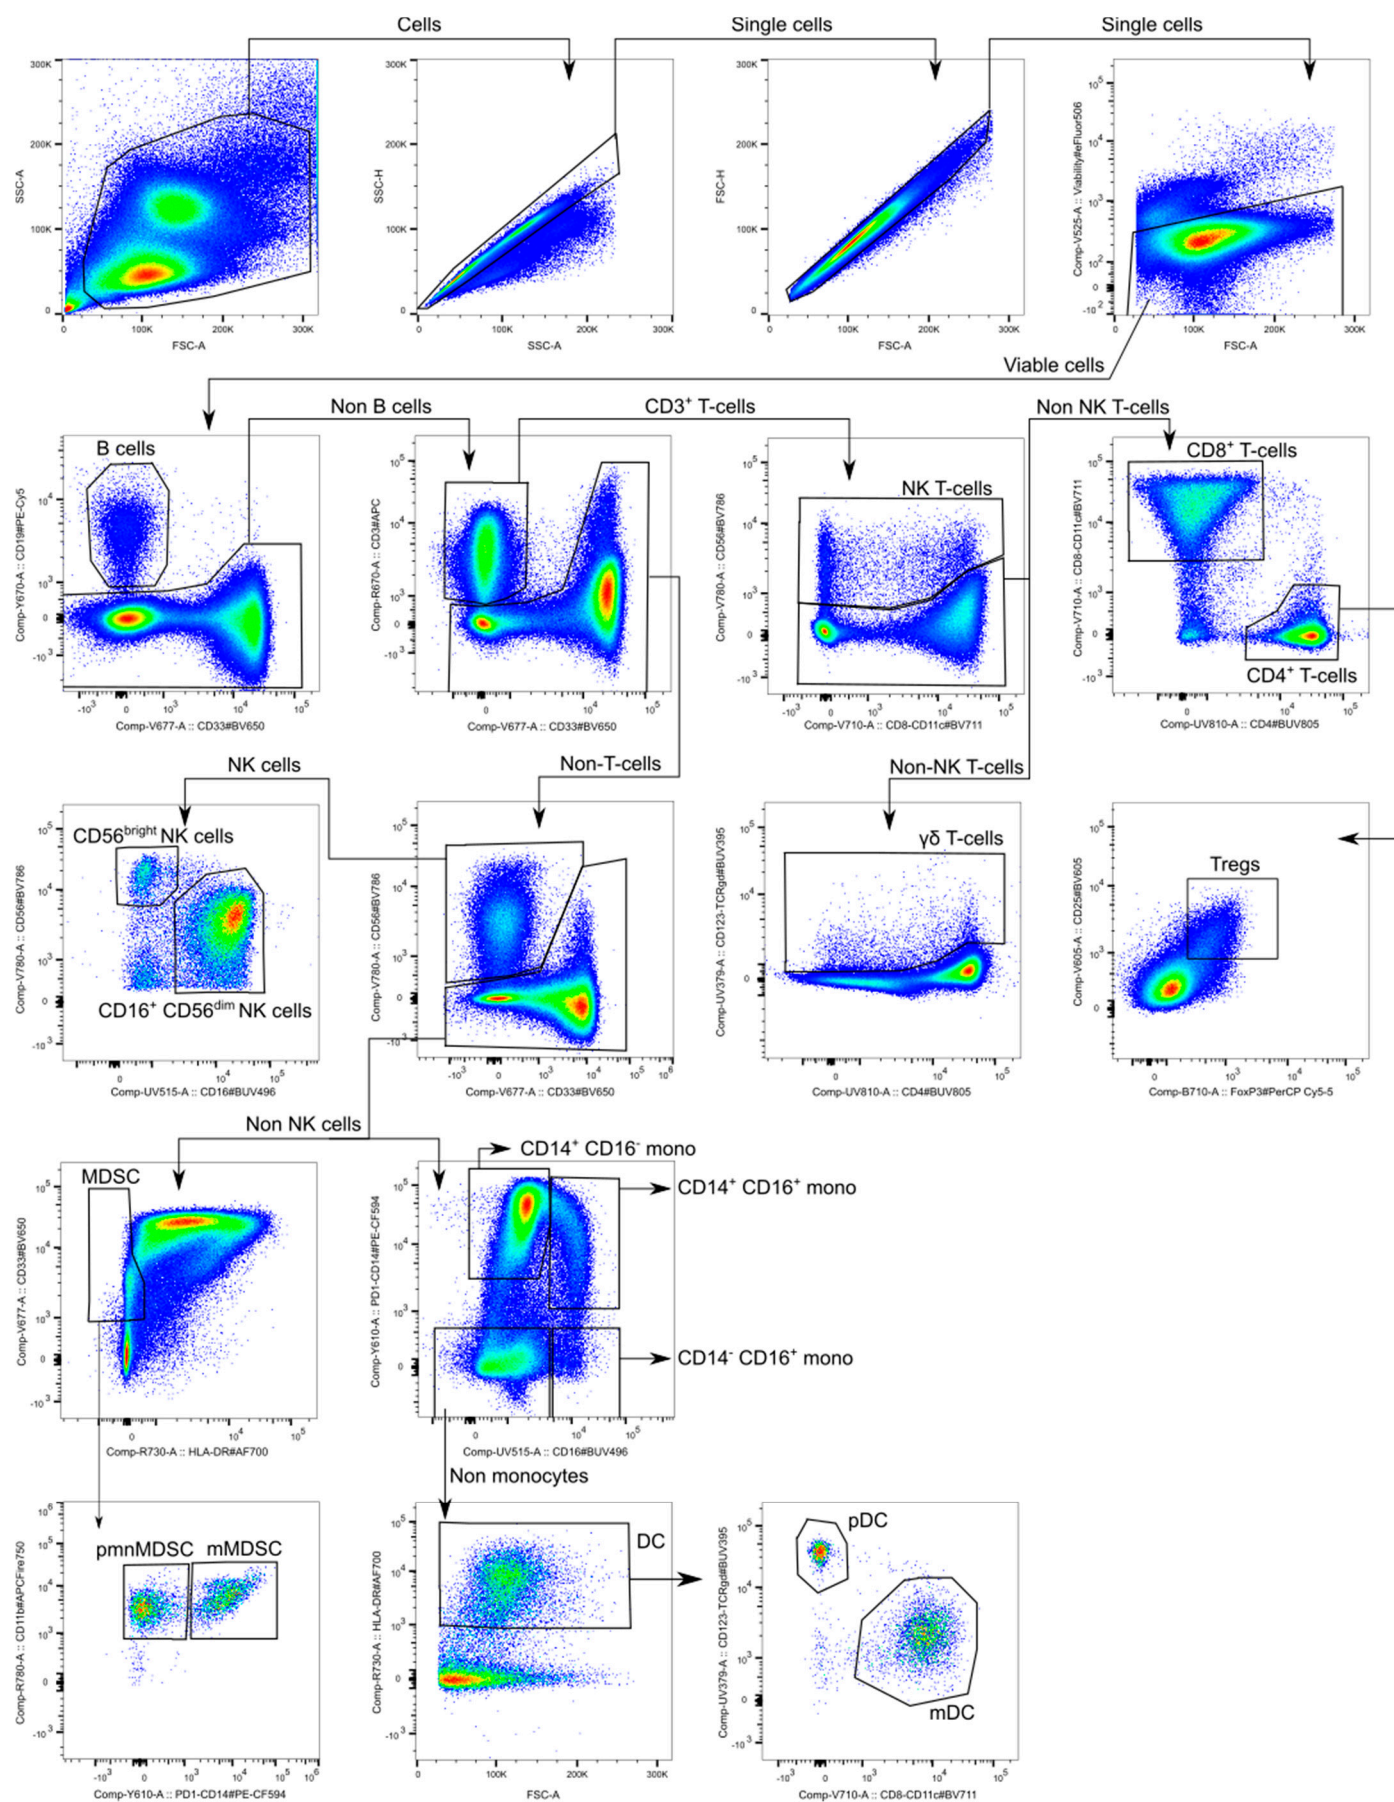

**Figure S1.** Gating strategies of immune cell populations analyzed in this study. Tregs, regulatory T-cells; MDSC, myeloid-derived suppressor cells; pmnMDSC, polymorphonuclear MDSC; mMDSC, monocytic MDSC; mono, monocytes; DC, dendritic cells; pDC, plasmacytoid DC; mDC, myeloid DC.

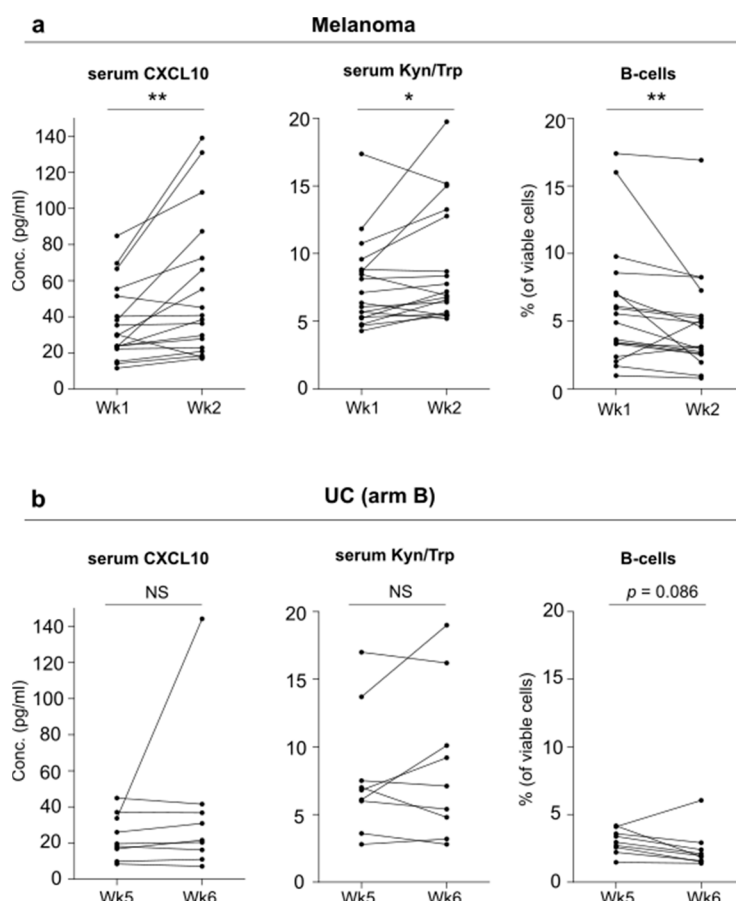

**Figure S2.** Systemic immune changes after SBRT. (a) Lineplots with the concentration of serum CXCL10, ratio of concentrations of serum Kyn and Trp ( $\times 100$ ) and the frequency of B-cells before and after SBRT in melanoma and (b) in UC (arm B). *P* value calculated using Wilcoxon Signed Ranks Test. \*  $p < 0.05$  and \*\*  $p < 0.01$ . NS, not significant; Wk, week.

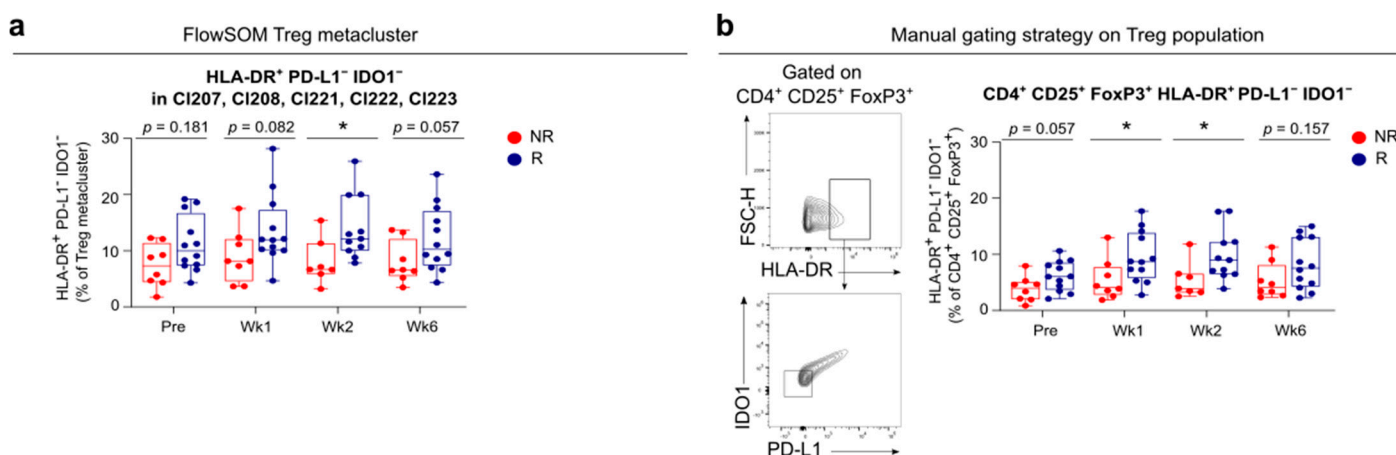

**Figure S3.** HLA-DR<sup>+</sup> PD-L1<sup>-</sup> IDO<sup>-</sup> expressing regulatory T-cells are upregulated in responding melanoma patients. (a) Boxplots with frequency of HLA-DR<sup>+</sup> PD-L1<sup>-</sup> IDO<sup>-</sup> expression in manually assigned Treg metacluster in non-responders (NR) and responders (R). (b) (left) Contour plots representing manual gating strategy of HLA-DR<sup>+</sup> PD-L1<sup>-</sup> IDO<sup>-</sup> expression in Treg (CD4<sup>+</sup> CD25<sup>+</sup> FoxP3<sup>+</sup>) population. (right) Boxplots with frequency of manually gated HLA-DR<sup>+</sup> PD-L1<sup>-</sup> IDO<sup>-</sup> expression in Treg population. Whiskers of boxplots extend to the minimum and maximum data point, with the horizontal line indicating the median. *p* value calculated using two-sided Mann-Whitney U test. \*  $p < 0.05$ . Wk, week.

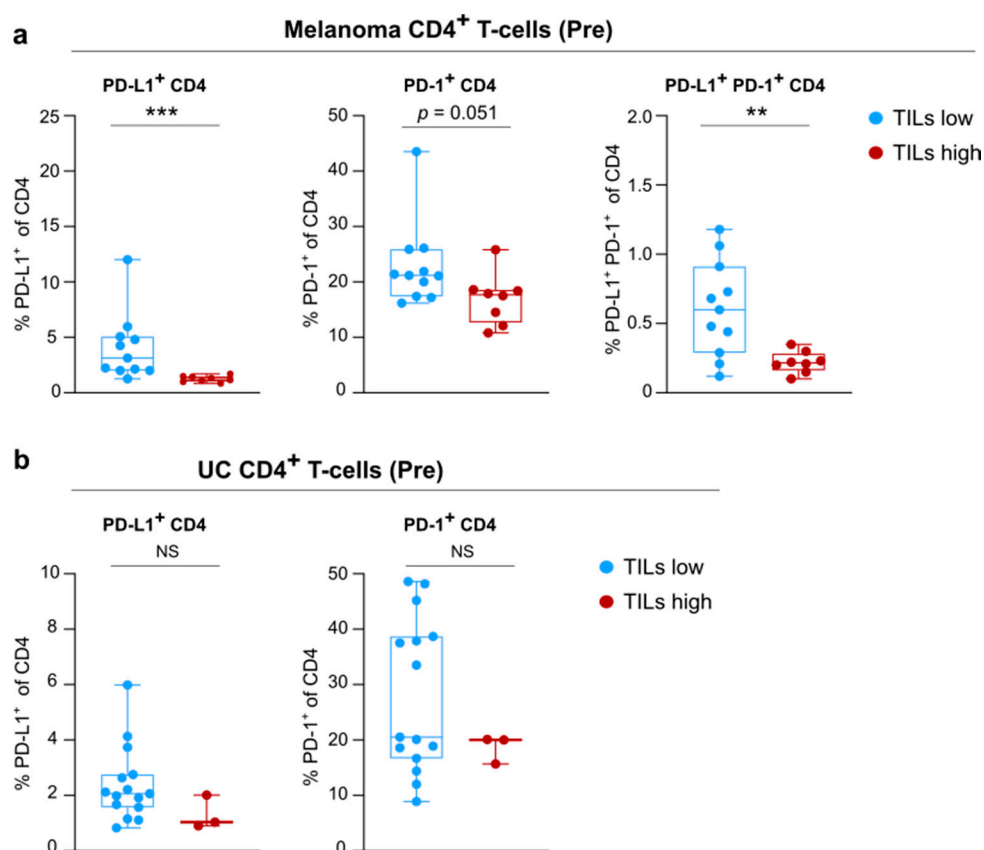

**Figure S4.** Abundance of TILs is linked with blood PD-L1 and PD-1 expression on CD4<sup>+</sup> T-cells. (a) Boxplots with frequency of pre-treatment PD-L1<sup>+</sup>, PD-1<sup>+</sup>, PD-L1<sup>+</sup> PD-1<sup>+</sup> expression on CD4<sup>+</sup> T-cells according to TILs score in tumor tissue of melanoma patients. (b) Boxplots with frequency of pre-treatment PD-L1<sup>+</sup> and PD-1<sup>+</sup> expression on CD4<sup>+</sup> T-cells according to TILs score in tumor tissue of UC patients. Whiskers of boxplots extend to the minimum and maximum data point, with the horizontal line indicating the median.  $P$  value calculated using two-sided Mann-Whitney U test. \*\*  $p < 0.01$  and \*\*\*  $p < 0.001$ . NS, not significant; Pre, pre-treatment; Wk, week. TILs were evaluated semi quantitatively: 1+, sporadic TILs; 2+, moderate number of TILs; 3+, abundant occurrence of TILs. For dichotomization, the TILs score was categorized into 'low' (1+ or 2+) and 'high' (3+).

**Table S1.** Patient characteristics of melanoma patients.

| Characteristic                             | Melanoma ( <i>n</i> = 20) |
|--------------------------------------------|---------------------------|
| Age, median (range), y                     | 60.5 (34.0–78.0)          |
| Male sex, <i>n</i> (%)                     | 13 (65)                   |
| Karnofsky PS, <i>n</i> (%)                 |                           |
| 90–100                                     | 17 (85)                   |
| 70–80                                      | 3 (15)                    |
| Primary melanoma, <i>n</i> (%)             |                           |
| Cutaneous                                  | 13 (65)                   |
| Uveal                                      | 1 (5)                     |
| Mucosal                                    | 1 (5)                     |
| Acral Lentiginous                          | 3 (15)                    |
| Unknown                                    | 2 (10)                    |
| Metastasis stage, <i>n</i> (%)             |                           |
| M0                                         | 5 (25)                    |
| M1a                                        | 2 (10)                    |
| M1b                                        | 3 (15)                    |
| M1c                                        | 8 (40)                    |
| M1d                                        | 2 (10)                    |
| BRAF mutation present, <i>n</i> (%)        | 11 (55)                   |
| Visceral disease, <i>n</i> (%)             | 12 (60)                   |
| Liver metastases, <i>n</i> (%)             | 5 (25)                    |
| LDH > ULN, <i>n</i> (%)                    | 7 (35)                    |
| Previous systemic treatments, <i>n</i> (%) |                           |
| 0                                          | 18 (90)                   |
| 1                                          | 1 (5)                     |
| 2                                          | 1 (5)                     |

Abbreviations: PS, performance status; ULN, upper limit of normal.

**Table S2.** Patient characteristics of urothelial cancer patients.

| Characteristic                             | arm A ( <i>n</i> = 9) | arm B ( <i>n</i> = 9) |
|--------------------------------------------|-----------------------|-----------------------|
| Age, median (range), y                     | 58 (54–75)            | 71 (50–84)            |
| Male sex, <i>n</i> (%)                     | 8 (89)                | 8 (89)                |
| ECOG PS, <i>n</i> (%)                      |                       |                       |
| 0                                          | 4 (44)                | 6 (67)                |
| 1                                          | 5 (56)                | 3 (33)                |
| Visceral disease, <i>n</i> (%)             | 5 (56)                | 6 (67)                |
| Liver metastases, <i>n</i> (%)             | 2 (22)                | 1 (11)                |
| Previous systemic treatments, <i>n</i> (%) |                       |                       |
| 0                                          | 2 (22)                | 3 (33)                |
| ≥1                                         | 7 (78)                | 6 (67)                |
| ≥2                                         | 3 (33)                | 1 (11)                |
| 3                                          | 2 (22)                | 0                     |

Abbreviations: PS, performance status.

**Table S3.** List of monoclonal antibodies for flow cytometry.

| Antigen            | Fluorochrome | Company     | Reference  | Clone         |
|--------------------|--------------|-------------|------------|---------------|
| CD123              | BUV395       | BD          | 564195     | 7G3           |
| TCR $\gamma\delta$ | BUV395       | BD          | 564155     | B1            |
| CD16               | BUV496       | BD          | 564654     | 3G8           |
| CD39               | BUV737       | BD          | 564726     | TU66          |
| CD4                | BUV805       | BD          | 564910     | SK3           |
| CD152 (CTLA-4) *   | BV421        | BD          | 565931     | BNI3          |
| LD                 | eFluor506    | eBioscience | 65-0866-14 | N/A           |
| CD25               | BV605        | BD          | 562661     | 2A3           |
| CD33               | BV650        | BD          | 740573     | WM-53         |
| CD8                | BV711        | BD          | 563676     | RPA-T8        |
| CD11c              | BV711        | BD          | 563130     | B-ly6         |
| CD56               | BV785        | Biolegend   | 362549     | 5.1H11        |
| Ki67 *             | AF488        | Biolegend   | 350507     | Ki-67         |
| FoxP3 *            | PerCP-Cy5-5  | BD          | 561493     | 236A/E7       |
| IDO *              | PE           | R&D         | MAB6030    | #700838       |
| CD14               | PE-CF594     | BD          | 562334     | M $\phi$ P-9  |
| CD279 (PD-1)       | PE/Dazzle594 | Biolegend   | 329939     | EH12.2H7      |
| CD19               | PE/Cy5       | BD          | 560993     | HIB19         |
| CD274 (PD-L1)      | PE/Cy7       | Biolegend   | 329717     | 29E.2A3       |
| CD3                | APC          | BD          | 561804     | HIT3 $\alpha$ |
| HLA-DR             | APC-R700     | BD          | 565128     | G46-6         |
| CD11b              | APC/Fire750  | Biolegend   | 301351     | ICRF44        |

\* Intracellular markers.
